# Supplementary material for: Three-Dimensional Neurophenotyping of Adult Zebrafish Behavior
Source: PubMed Central journal article supplement (PMC3049776; doi:10.1371/journal.pone.0017597), 2011-03-07

# Figure S1a. Anxiogenic experimental manipulations

## Alarm Pheromone (7 ml, 5 min)

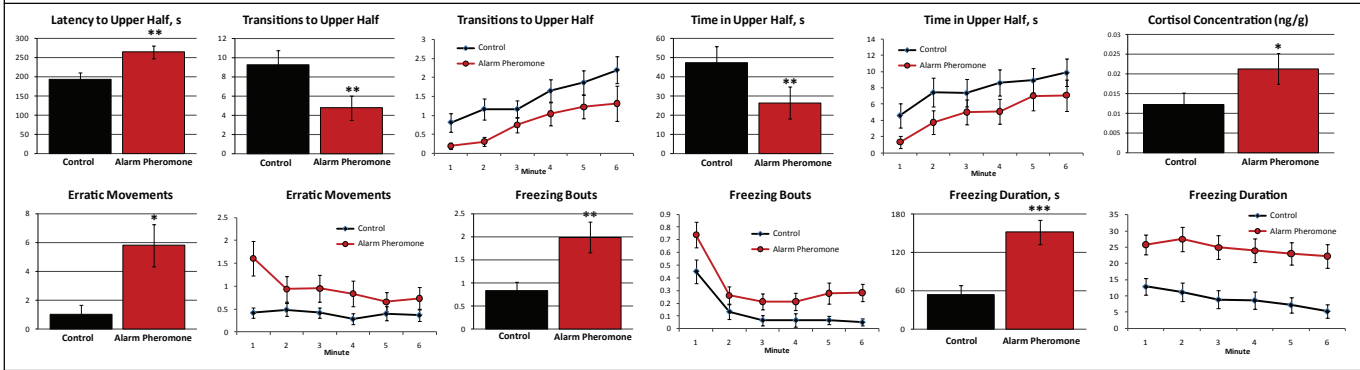

## Repeated Morphine Withdrawal (3h withdrawal, twice/day for 1 wk)

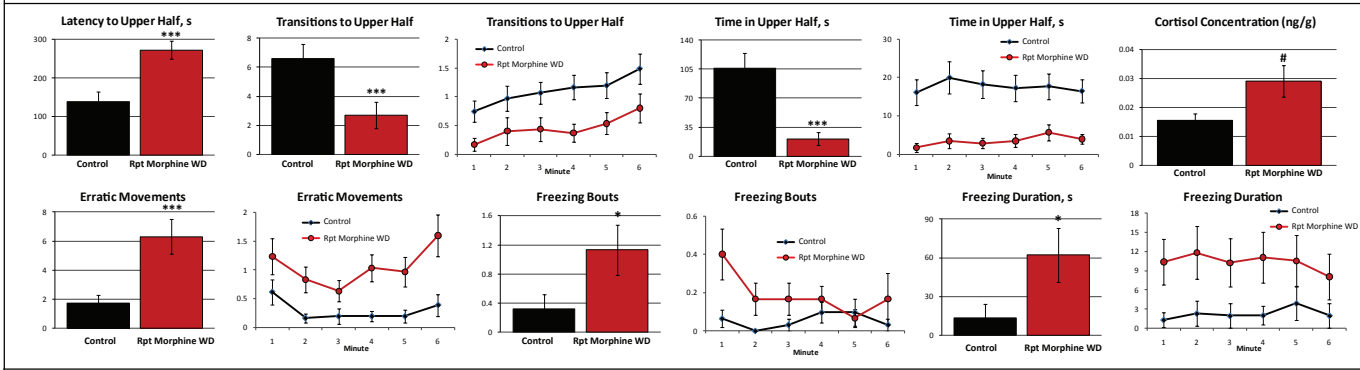

## Leopard (10 mg/l, 5 min)

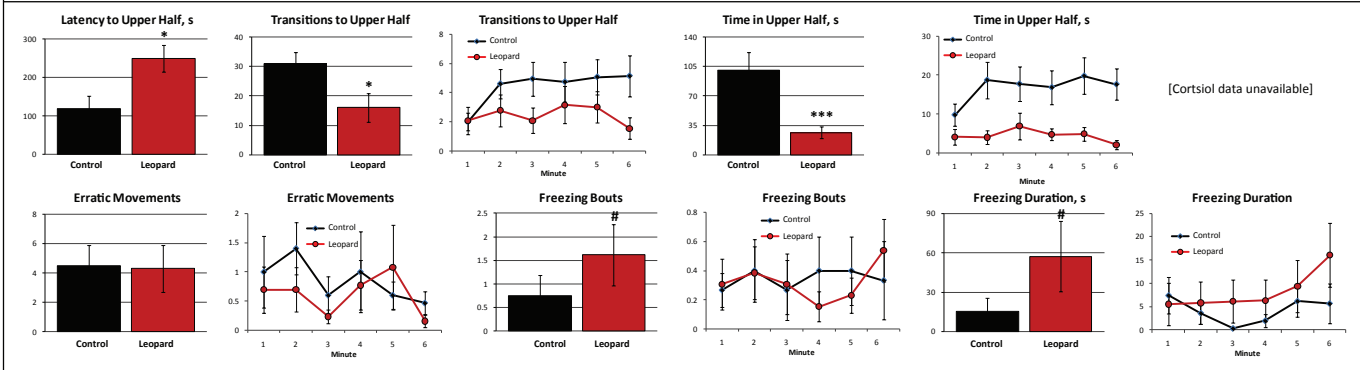

## Caffeine (250 mg/l, 20 min)

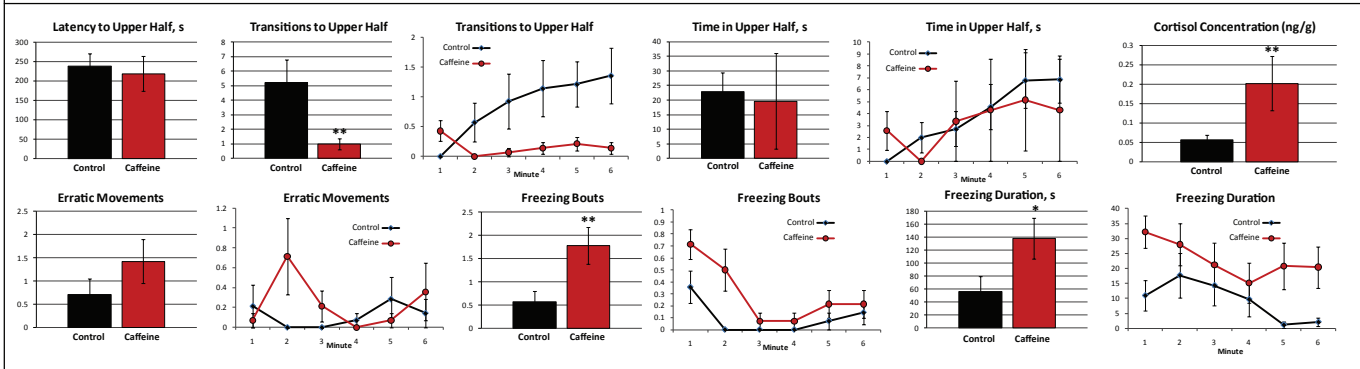

# Figure S1b. Anxiolytic experimental manipulations

## Chronic Fluoxetine (0.3% vol/vol, 1 wk)

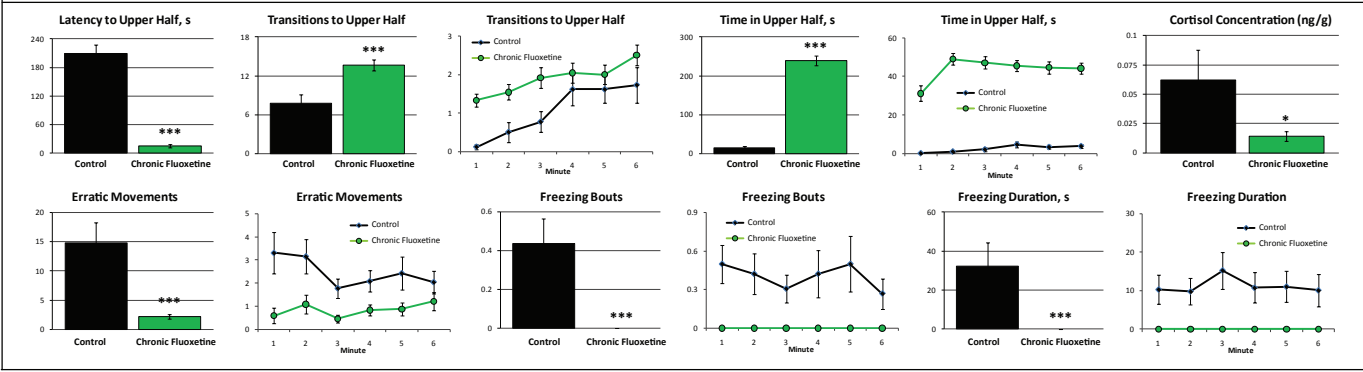

## Chronic Ethanol (0.3% vol/vol, 1 wk)

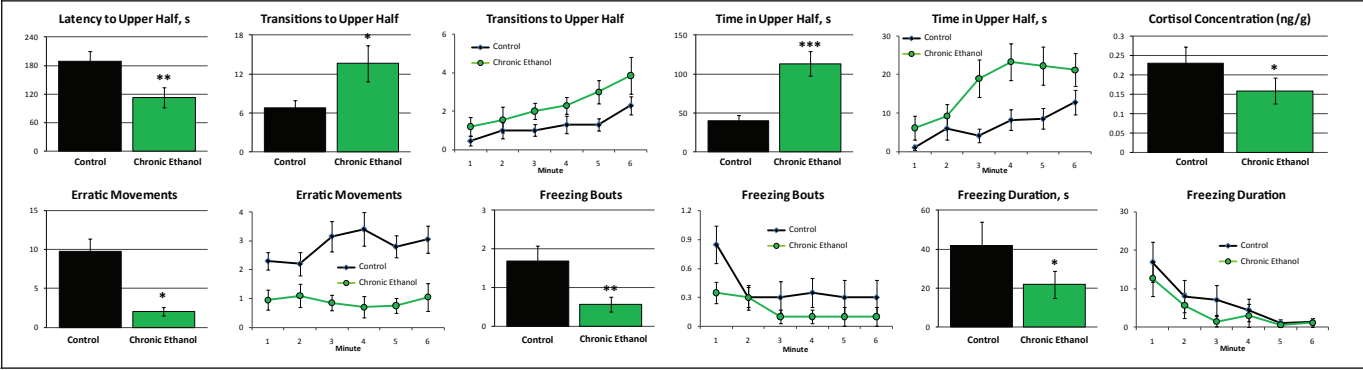

## Chronic Morphine (2mg/l, 2 wks)

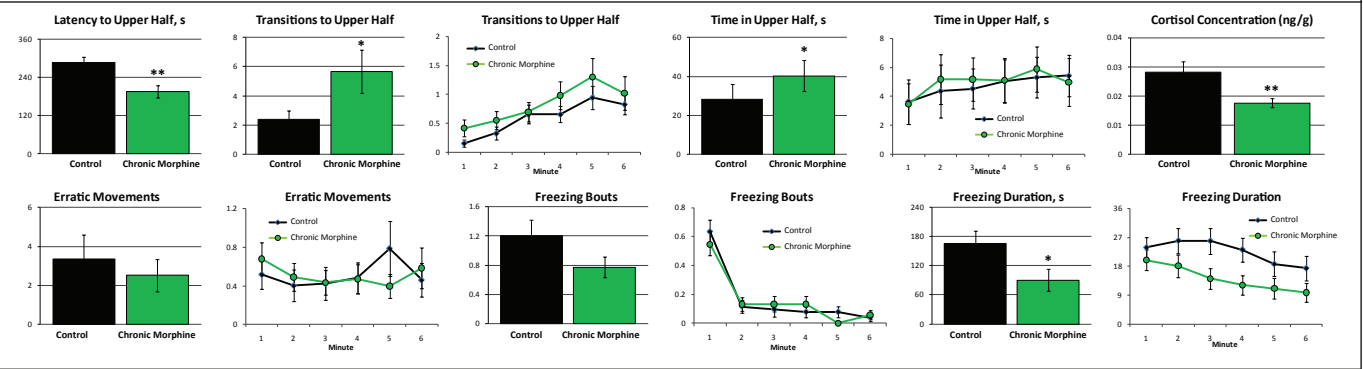

## Nicotine (10 mg/l, 5 min)

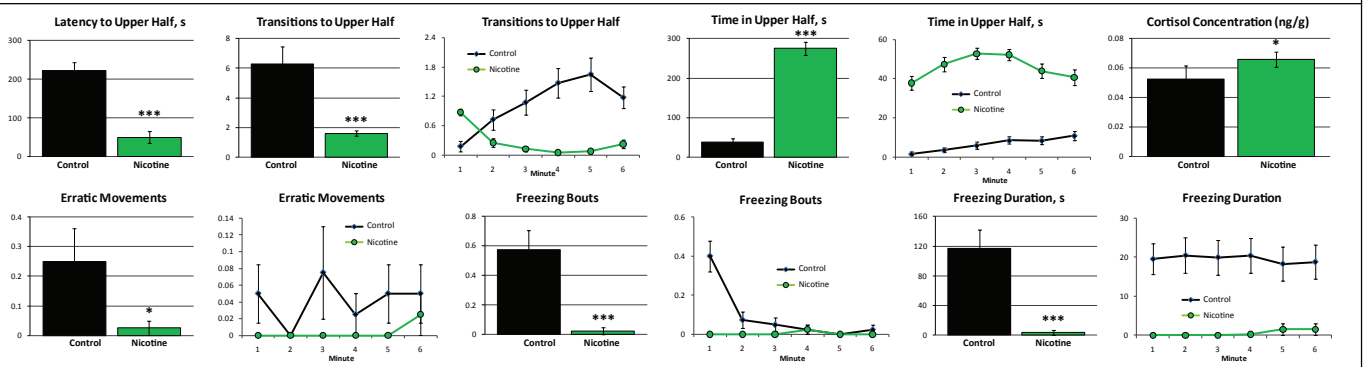

Supplement: pone.0017597.s001.pdf [file pone.0017597.s001.pdf]
